# Supplementary material for: Manipulating Zn 002 deposition plane with zirconium ion crosslinked hydrogel electrolyte toward dendrite free Zn metal anodes
Source: Royal Society of Chemistry journal article supplement (doi:10.1039/d3ee02114a), 2023-01-01
Supplement: d3ee02114a1.pdf [file d3ee02114a1.pdf]

*Electronic Supplementary Information (ESI) for Energy & Environmental Science.*

## **Supporting Information**

### **Manipulating Zn 002 deposition plane with zirconium ion crosslinked hydrogel electrolyte toward dendrite free Zn metal anodes**

Yong Cheng, Yucong Jiao\* and Peiyi Wu\*

Department State Key Laboratory for Modification of Chemical Fibers and Polymer Materials,  
College of Chemistry and Chemical Engineering, Donghua University, Shanghai 201620, China.

E-mail: wupeiyi@dhu.edu.cn; yucong.jiao@dhu.edu.cn

### **Content**

1. Experimental Procedures
2. Figures S1 to S43
3. Supplementary Table
4. References

## Experimental Procedures

### Materials

Acrylamide (AM) monomer and poly(ethylene glycol) diacrylate (PEGDA, Mn~575) were procured from Sigma-Aldrich Co., Ltd. Zinc perchlorate hexahydrate ( $Zn(ClO_4)_2 \cdot 6H_2O$ ), zirconium oxychloride octahydrate ( $ZrOCl_2 \cdot 8H_2O$ ) and aniline monomer were sourced from Aladdin Co., Ltd. Silk fibroin (SF) was purchased from XinTianSi Co., Ltd. (Huzhou, China). Zinc foil was obtained from Qingyuan Metal Co., Ltd. The carbon cloth was supplied by Ce-Tech Co., Ltd.

### Preparation of SFPAM-Zr hydrogel electrolyte

A mixture of 10 wt.% SF solution and 4.8 g AM monomer was firstly prepared with vigorously stirring. Subsequently, I2959 (0.1 wt.% for AM monomer) and PEGDA-575 (0.1 wt.% for monomer) were added to the mixture following with polymerized under UV light for 40 min to obtain SFPAM hydrogel. The SFPAM-Zr hydrogel electrolyte was achieved by immersing SFPAM hydrogel in an electrolyte solution containing 2 M  $Zn(ClO_4)_2$  and 0.01 M  $ZrOCl_2$  for 12 h. The SFPAM hydrogel electrolyte was prepared by soaking SFPAM hydrogel in 2 M  $Zn(ClO_4)_2$  solution for 12 h.

### Preparation of PANI/CC cathode

The PANI/CC cathode was synthesized via a typical in situ polymerization method<sup>1</sup>. Generally, the aniline monomer is polymerized on carbon cloth in an ice bath with 1 M HCl solution. The product was then washed and vacuum dried to obtain the PANI/CC cathode.

### Materials characterization

The mechanical strength of the hydrogel electrolyte was evaluated by the testing machine of UTM2103 (Shenzhen Suns Technology Co., Ltd.). The morphologies and components of the hydrogel electrolyte were examined with scanning electron microscopy (SEM, Hitachi SU8230) and energy-dispersive X-ray spectroscopy (EDS). Fourier transform infrared spectrometer (FTIR, Nicolet iS50) and X-ray photoelectron spectroscopy (XPS, Escalab 250Xi) were employed to characterize the interactions in SFPAM-Zr. The crystal plane and surface morphology of Zn metal were detected by means of Powder X-ray diffractometer (XRD, D/max-2550VB) and scanning electron microscopy (SEM, Hitachi SU8230).

### Electrochemical measurements

The ionic conductivity determined by electrochemical impedance spectroscopy (EIS, CHI760E) was calculated with the following equation (1):

$$\sigma = \frac{l}{R \cdot S} \quad \text{Equation (1)}$$

Where  $l$  is the electrolyte thickness,  $S$  denotes the area, and  $R$  signifies the resistance.

The transference number of  $Zn^{2+}$  was performed on Autolab electrochemical workstation (M204) and calculated according to equation (2)<sup>2</sup>:

$$t_{Zn^{2+}} = \frac{R_{cell}}{R_{DC}} \quad \text{Equation (2)}$$

Where  $R_{cell}$  represents the resistance prior to polarization,  $R_{DC}$  is obtained by the applied potential of 20 mV and the steady-state current.

The Tafel and HER test were both conducted by the three-electrode system, with the saturated calomel electrode (SCE), platinum plate and Zn plate as reference, counter, and working electrode, respectively. The Chronoamperometry (CA) was conducted with an overpotential of -150 mV. The zeta potential was collected on Zeta potential analyzer (SurPASS 3, Andon paar). The electric double layer capacitance was examined in a voltage range of -0.015-0.015 V, with scanning rates from 4 mV s<sup>-1</sup> to 10 mV s<sup>-1</sup>. The in situ electrochemical impedance spectroscopy (EIS) was implemented for symmetrical Zn battery with 3 minutes deposition and 3 minutes rest at 1 mA cm<sup>-2</sup>. The galvanostatic intermittent titration technique (GITT) tests were performed with a discharge pulse of 40 s at 0.5 A g<sup>-1</sup>, and a rest period of 1800 s. The cyclic voltammetry (CV) of Zn/PANI cell was recorded in the range between 0.5 V and 1.5 V on an Autolab electrochemical workstation. The shelving-recovery charge/discharge performance was tested under the current density of 8 mA cm<sup>-2</sup>, and shelving for 20 h after every 80 cycles.

### Density functional theory (DFT) calculations

DFT calculations were carried out using the Vienna ab-initio Simulation Package (VASP) with the projector-augmented wave (PAW) method. All calculations were based on the same generalized gradient approximation (GGA) method with Perdew-Burke-Ernzerhof (PBE) functional for the exchange-correlation term. Van der Waals interaction was taken into account at DFT-D3 with Becke-Jonson damping level. An energy cutoff of 500 eV and Gamma-centered  $3 \times 3 \times 1$  k-points mesh were applied to absorption calculations. The convergence thresholds for energy were set as  $10^{-6}$  eV during ion relaxation, and the convergence thresholds for force was set as  $0.02 \text{ eV} \cdot \text{\AA}^{-1}$ . Visualization of the structures is made by using VESTA software.  $E_a$  was calculated by the energy difference of the system after and before adsorption:

$$E_a = E_{A\text{-substrate}} - E_A - E_{\text{substrate}}$$

where  $E_{A\text{-substrate}}$ ,  $E_A$ , and  $E_{\text{substrate}}$  represent the energies of the A adsorbed surface, A atom or molecule, and the surface, respectively.

To model Zn or Zr diffusion on Zn(002) surface, the climbing-image nudged elastic band (CI-NEB) method with 4 images was applied and each transition state was confirmed to have a single imaginary

vibrational frequency along the reaction coordinate. The convergence thresholds for energy were set as  $10^{-6}$  eV and the convergence thresholds for force were set as  $0.05 \text{ eV} \cdot \text{\AA}^{-1}$  in CI-NEB procedure.

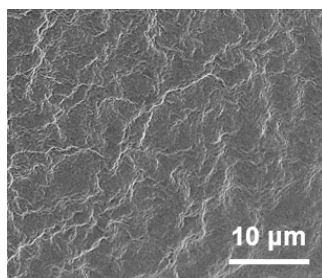

**Fig. S1** The SEM image for surface morphology of SFPAM-Zr hydrogel electrolyte.

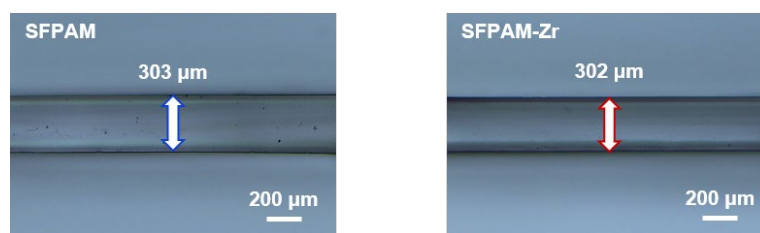

**Fig. S2** Optical microscope images of SFPAM and SFPAM-Zr.

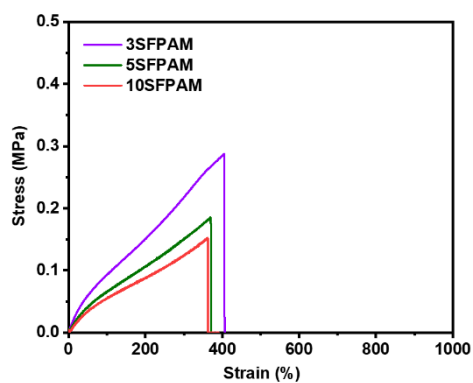

**Fig. S3** The tensile stress-strain curves for SFPAM-Zr hydrogel electrolyte with different silk fibroin weight ratios.

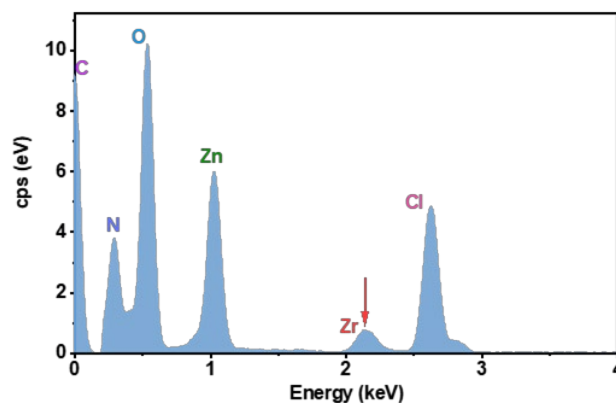

**Fig. S4** EDS data for SFPAM-Zr hydrogel electrolyte.

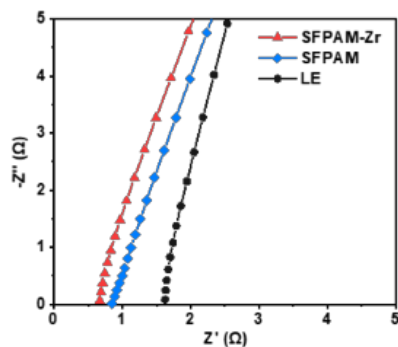

**Fig. S5** AC impedance spectra for SFPAM-Zr, SFPAM and LE.

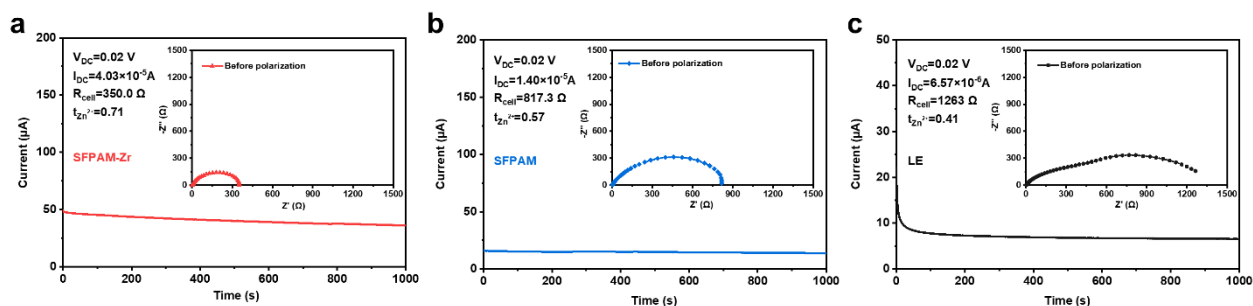

**Fig. S6**  $Zn^{2+}$  transference number characterizations for (a) SFPAM-Zr, (b) SFPAM, and (c) LE.

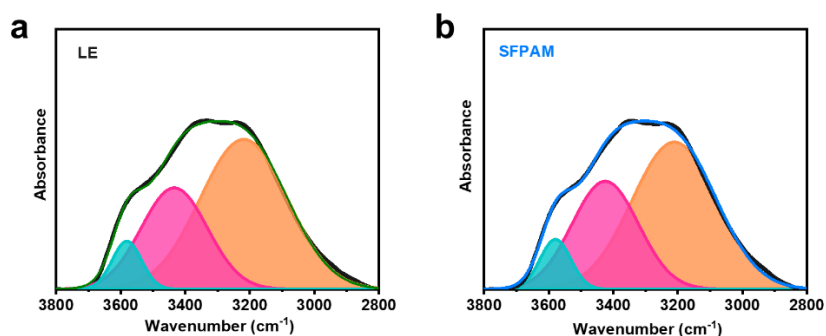

**Fig. S7** The fitted FTIR spectra for LE and SFPAM in the range between  $3800-2800\text{ cm}^{-1}$ .

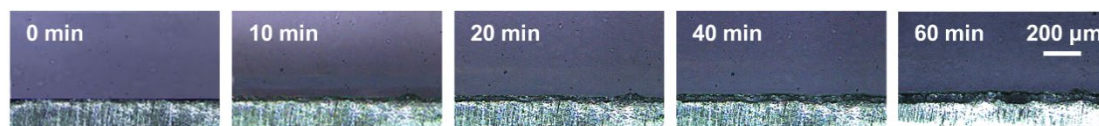

**Fig. S8** *In situ* optical images of Zn plating behaviors with SFPAM electrolyte.

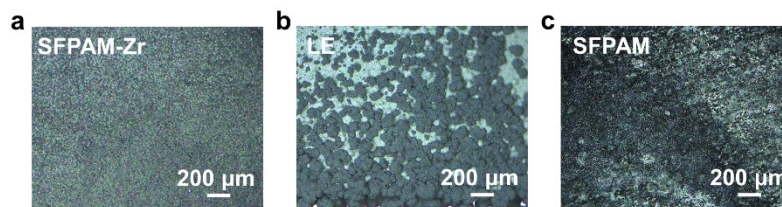

**Fig. S9** Optical images of Zn metal surface after plating at the current density of  $10 \text{ mA cm}^{-2}$  with (a) SFPAM-Zr (b) LE and (c) SFPAM for 60 min.

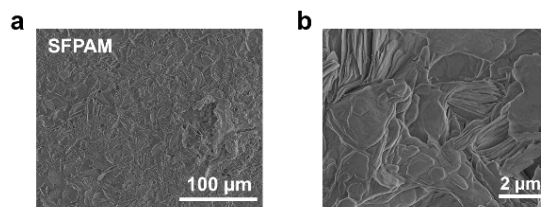

**Fig. S10** SEM images of the Zn metal surface after plating for 60 min with SFPAM.

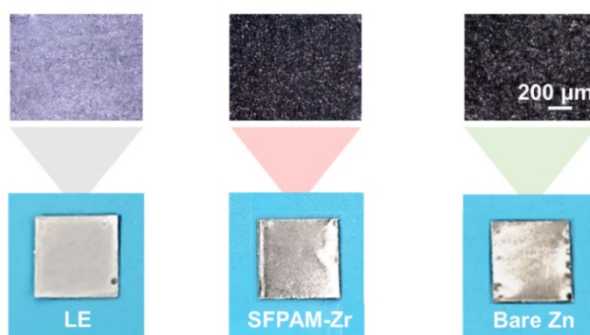

**Fig. S11** Optical images of the Zn metal surface before and after covering with SFPAM-Zr and immersing in LE for 9 h.

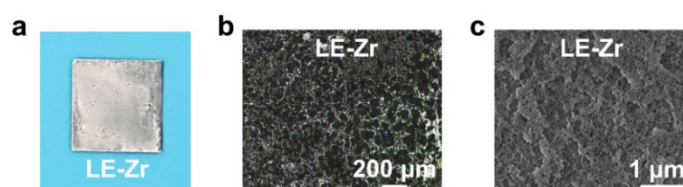

**Fig. S12** The (a, b) optical and (c) SEM images of the Zn metal surface after immersing in LE-Zr electrolyte for 12 h.

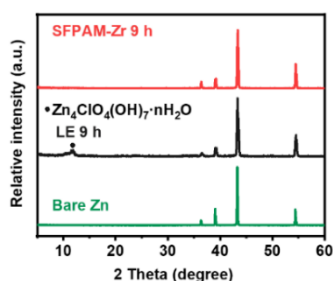

**Fig. S13** XRD patterns of the Zn metal covered with SFPAM-Zr and immersed in LE for 9 h, respectively.

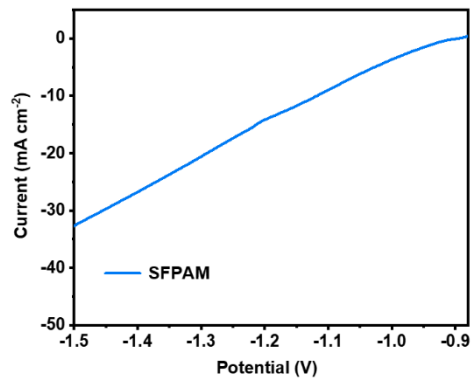

**Fig. S14** The HER curve for Zn metal with SFPAM.

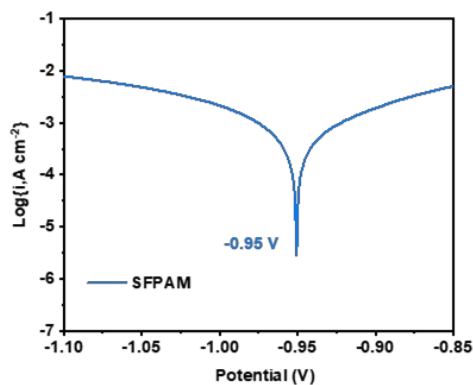

**Fig. S15** The Tafel curve for Zn metal with SFPAM.

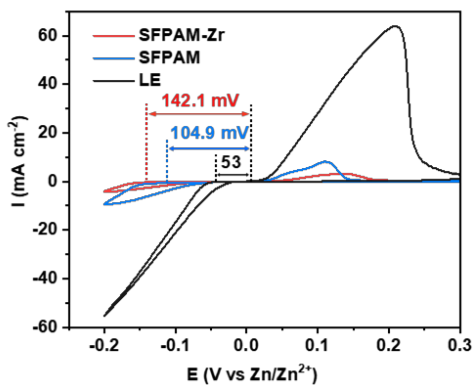

**Fig. S16** Cyclic voltammetry curves for Zn metal with SFPAM-Zr, LE and SFPAM, respectively.

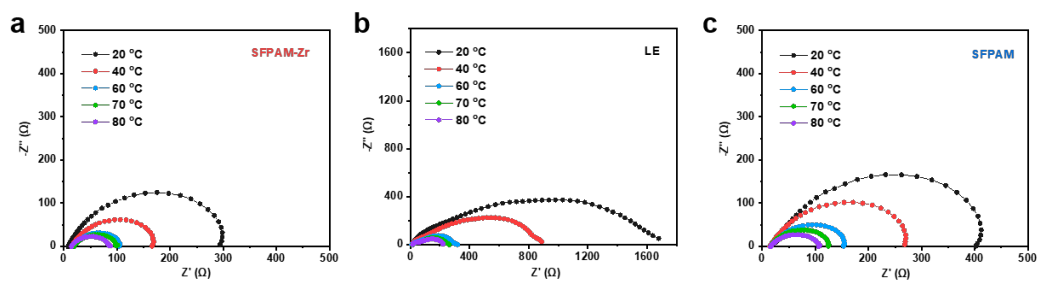

**Fig. S17** EIS characterizations for the symmetrical Zn batteries with (a) SFPAM-Zr, (b) LE, and (c) SFPAM.

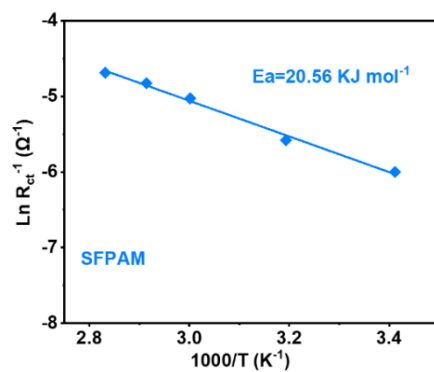

**Fig. S18** The calculated  $E_a$  result for symmetrical Zn battery with SFPAM.

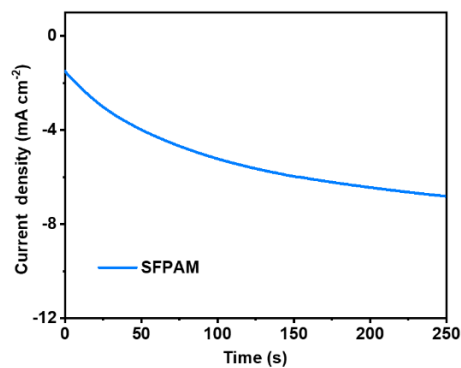

**Fig. S19** The CA curve for symmetrical Zn battery with SFPAM.

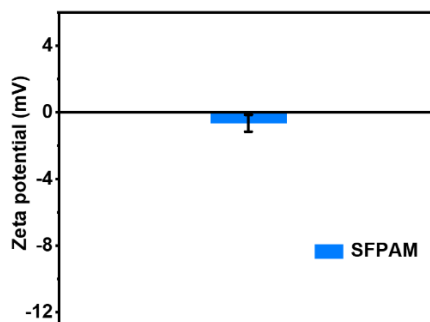

**Fig. S20** The Zeta potential of Zn metal after deposited with SFPAM.

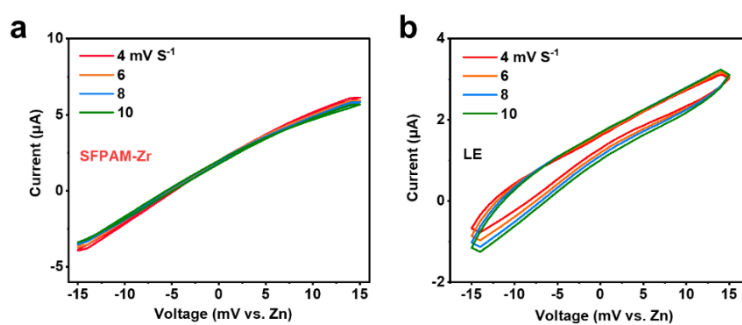

**Fig. S21** CV profiles of the symmetrical Zn battery with (a) SFPAM-Zr and (b) LE.



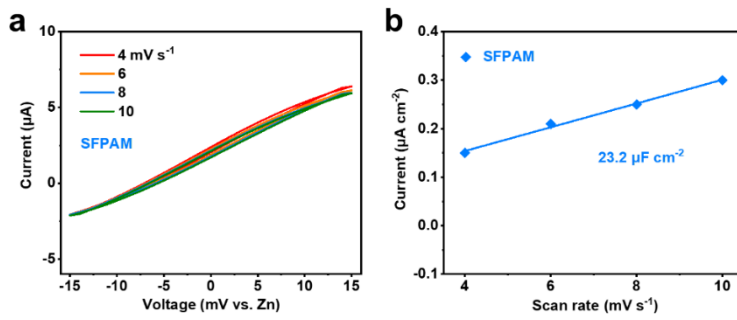

**Fig. S22** (a) CV profiles of the symmetrical Zn battery with SFPAM. (b) EDL measurements for Zn metal with SFPAM.

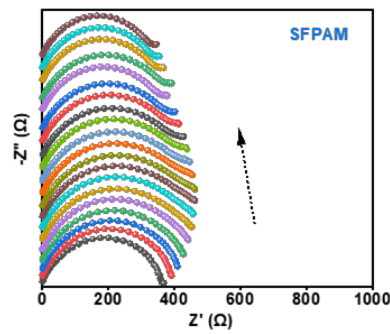

**Fig. S23** *In situ* EIS curves for symmetrical Zn battery with SFPAM.

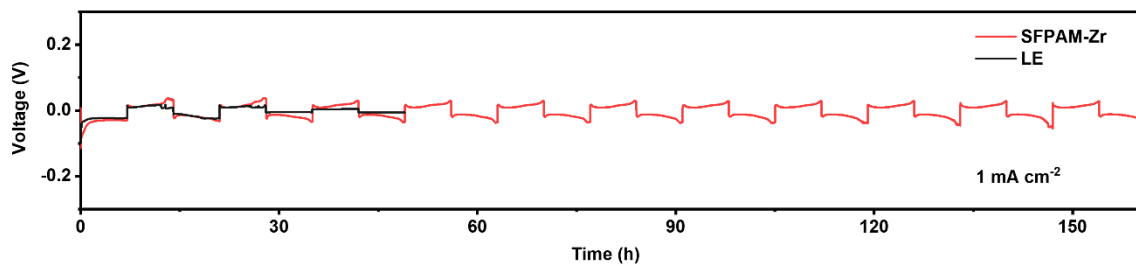

**Fig. S24** The stripping/plating performance of symmetrical Zn cell with SFPAM-Zr and LE at  $1 \text{ mA cm}^{-2}$  and  $7 \text{ mA h cm}^{-2}$ .

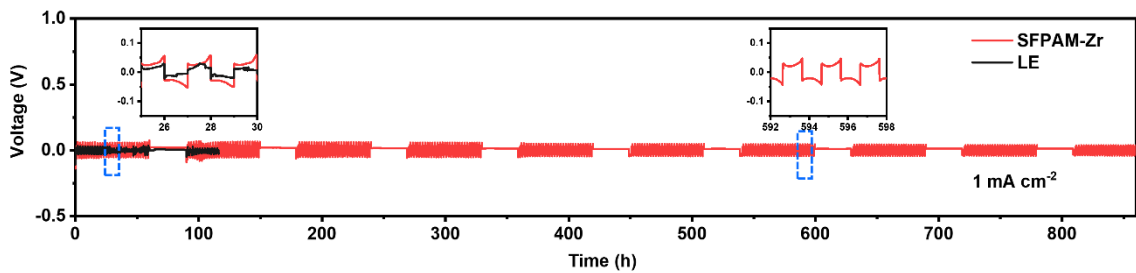

**Fig. S25** Shelving-recovery performance of SFPAM-Zr and LE at  $1 \text{ mA cm}^{-2}$  and  $1 \text{ mA h cm}^{-2}$ .

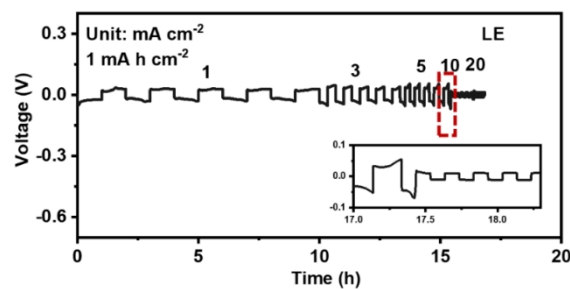

**Fig. S26** The rate performance of symmetrical Zn cell with LE.

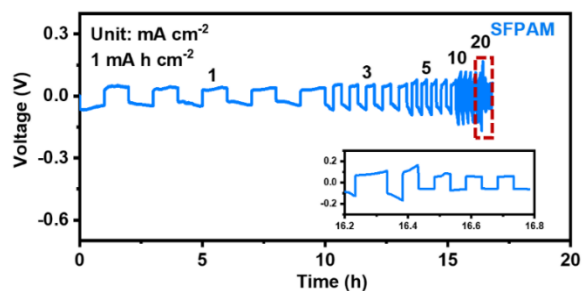

**Fig. S27** The rate performance of symmetrical Zn cell with SFPAM.

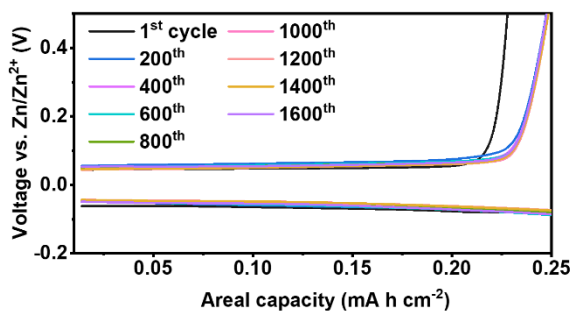

**Fig. S28** The voltage/capacity curves for asymmetrical Zn/Cu cell with SFPAM-Zr at different cycles.

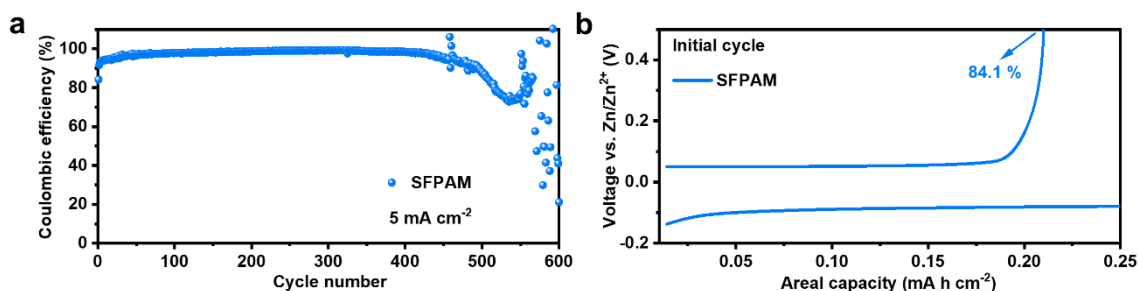

**Fig. S29** (a) The CE performance of the asymmetrical Zn/Cu battery with SFPAM at current density of  $5 \text{ mA cm}^{-2}$ , and (b) the corresponding initial cycle curves.

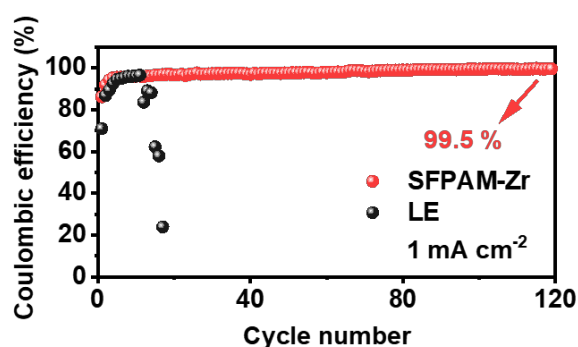

**Fig. S30** The CE performance of the asymmetrical Zn/Cu cell with SFPAM-Zr and LE at  $1 \text{ mA cm}^{-2}$  for  $1 \text{ mA h cm}^{-2}$ .

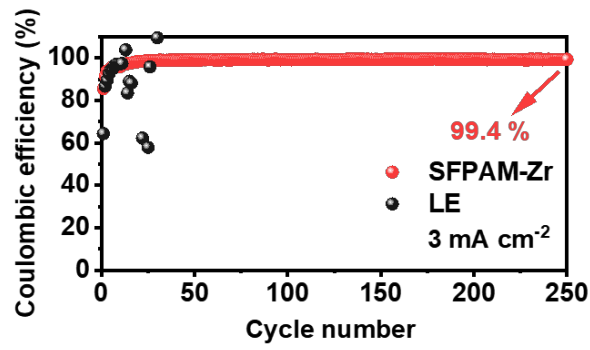

**Fig. S31** The CE performance of the asymmetrical Zn/Cu cell with SFPAM-Zr and LE at  $3 \text{ mA cm}^{-2}$  for  $1 \text{ mA h cm}^{-2}$ .

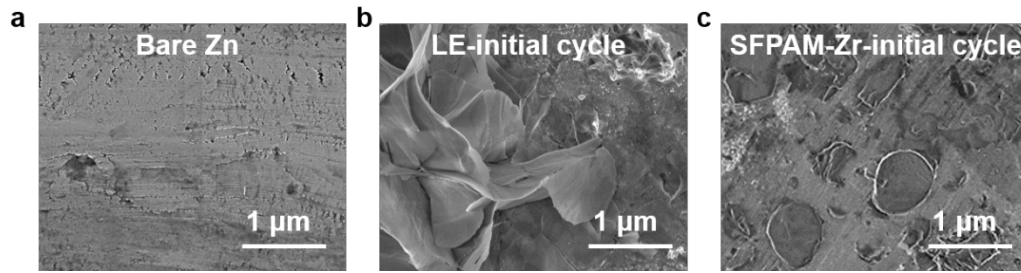

**Fig. S32** The SEM images of (a) bare Zn, Zn metal after the initial cycle with (b) LE and (c) SFPAM-Zr.

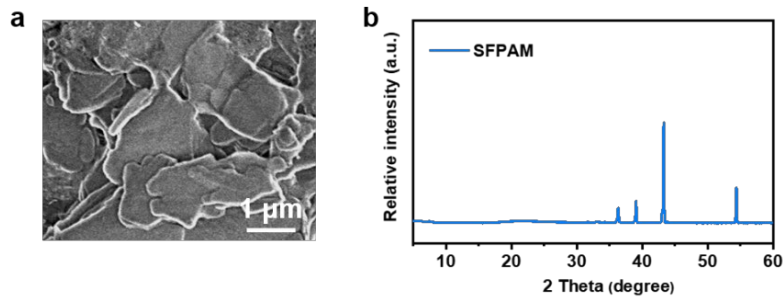

**Fig. S33** The (a) SEM image and (b) XRD pattern for the Zn metal of symmetrical Zn battery with SFPAM after 10 cycles.

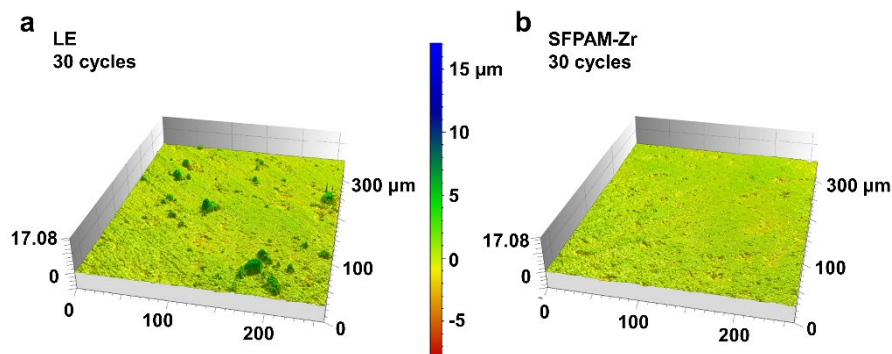

**Fig. S34** CLMS images of Zn metal after 30 cycles with (a) LE and (b) SFPAM-Zr.

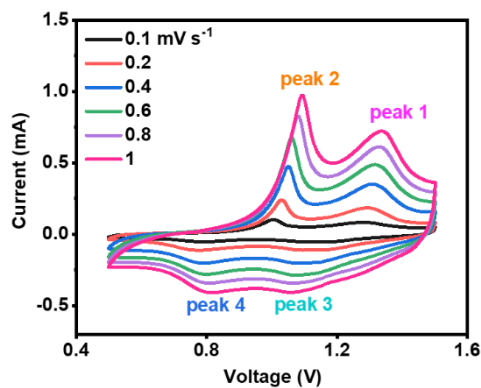

**Fig. S35** CV curves of the Zn/PANI battery with SFPAM-Zr at different scan rate from 0.1 to 1  $\text{mV s}^{-1}$ .

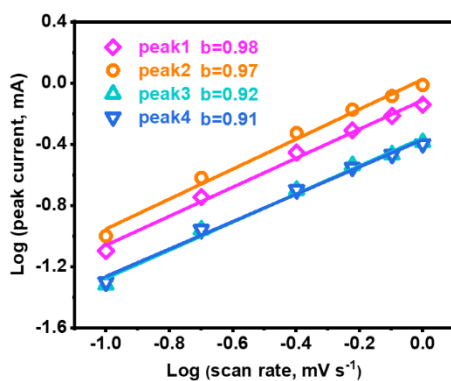

**Fig. S36** The plots for log (peak current) versus log (scan rate).

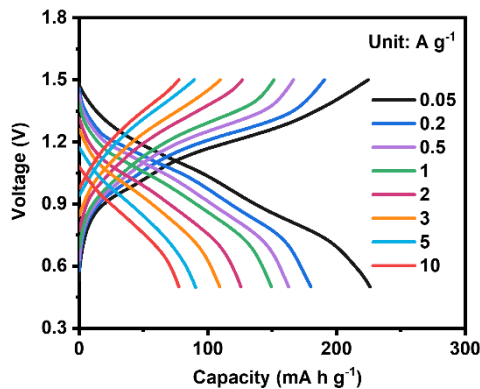

**Fig. S37** The discharge/charge curves for the Zn/PANI battery with SFPAM-Zr at different current densities.

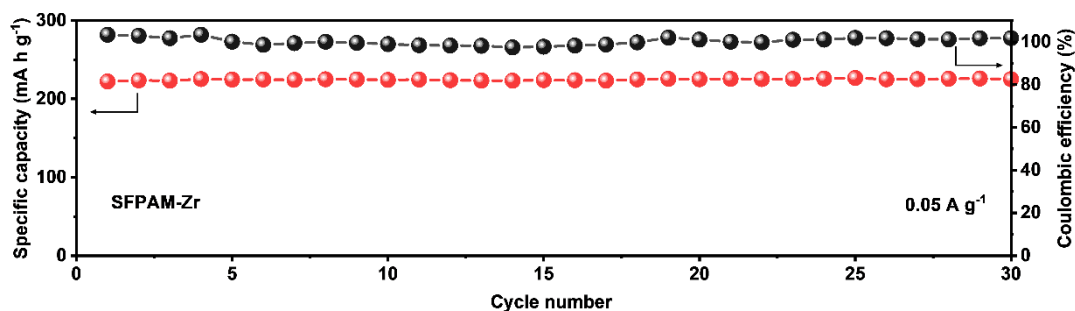

**Fig. S38** Cycling performance of the Zn/PANI battery with SFPAM-Zr at  $0.05 \text{ A g}^{-1}$ .

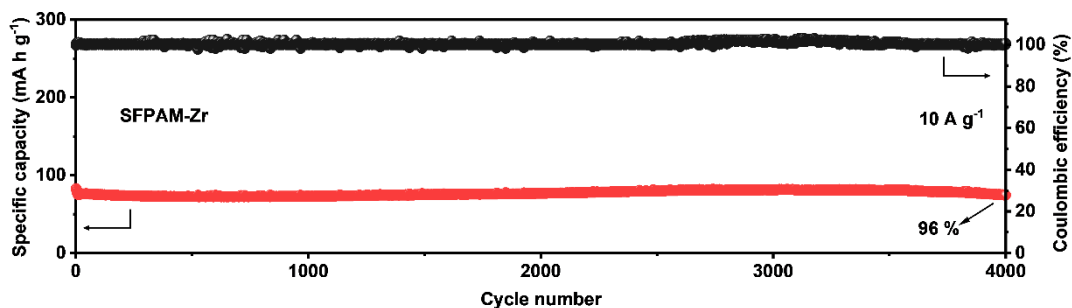

**Fig. S39** Cycling performance of the Zn/PANI battery with SFPAM-Zr at  $10 \text{ A g}^{-1}$ .

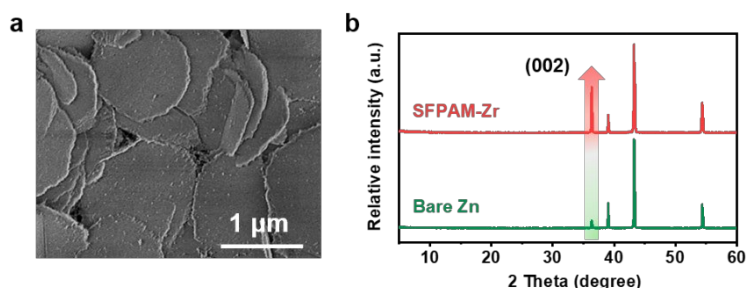

**Fig. S40** The (a) SEM image and (b) XRD patterns of Zn metal anode after 2500 cycles with SFPAM-Zr for Zn/PANI battery.

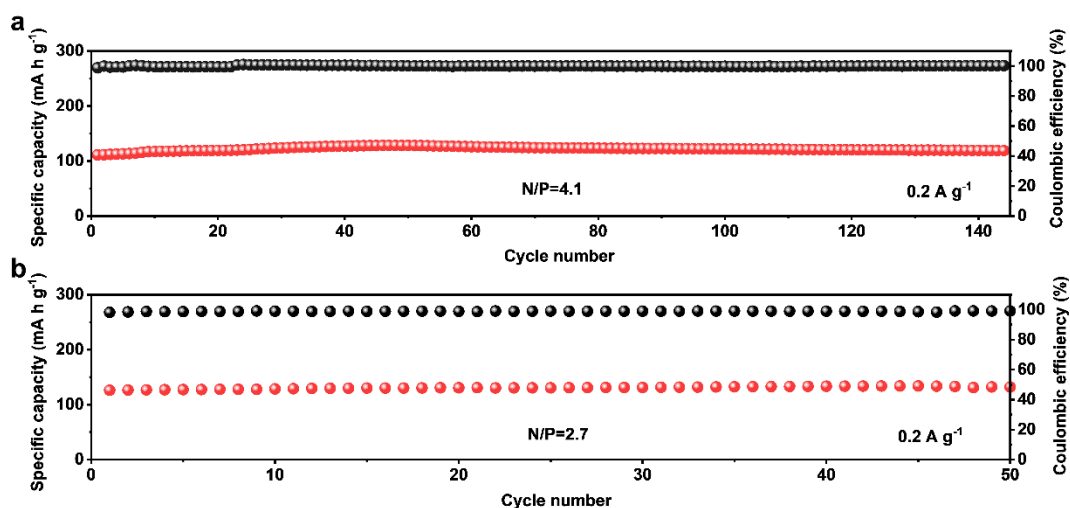

**Fig. S41** The cycling performance of the Zn/PANI batteries with SFPAM-Zr at the N/P ratio of (a) 4.1 and (b) 2.7.

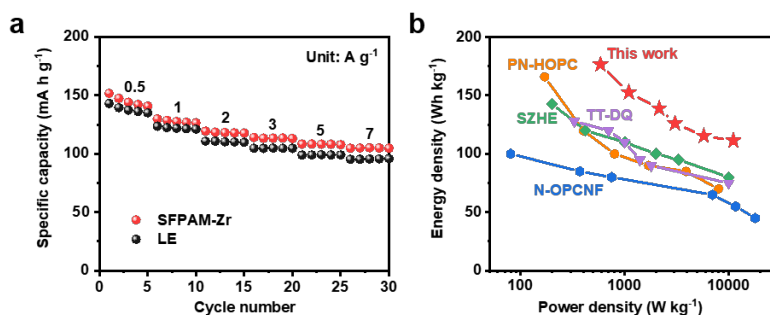

**Fig. S42** (a) The rate performance of Zn/AC capacitors with SFPAM-Zr and LE at different current densities. (b) Ragone plots of Zn/AC capacitor with SFPAM-Zr and recently reported works.<sup>3-6</sup>

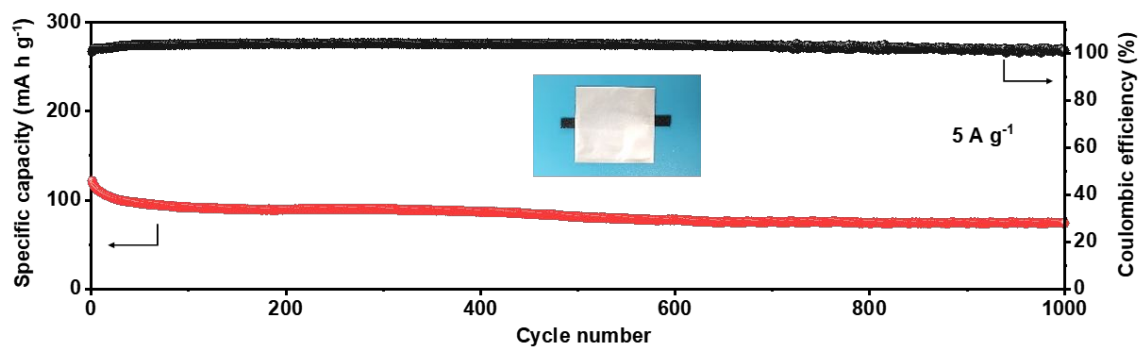

**Fig. S43** Cycling performance of the flexible Zn/PANI with SFPAM-Zr at 5 A g<sup>-1</sup>.

## Supplementary Table

**Table S1.** Comparisons of the N/P ratio between this work and other reported Zn batteries.

| Modified strategies  | Cathode                                                             | Zn anode  | Current density       | Areal capacity (mA h cm <sup>-2</sup> ) | N/P ratio | Reference |
|----------------------|---------------------------------------------------------------------|-----------|-----------------------|-----------------------------------------|-----------|-----------|
| SFPAM-Zr gel         | PANI                                                                | 10 μm Zn  | 0.2 A g <sup>-1</sup> | 1.8                                     | 2.7       | This work |
| SFPAM-Zr gel         | PANI                                                                | 20 μm Zn  | 0.2 A g <sup>-1</sup> | 1.9                                     | 4.1       | This work |
| Gelatin coating      | V <sub>6</sub> O <sub>13</sub>                                      | 50 μm Zn  | 0.1 A g <sup>-1</sup> | 0.75                                    | 35.06     | 7         |
| PVB coating          | MnO <sub>2</sub>                                                    | 10 μm Zn  | 1C                    | 0.28                                    | 16.86     | 8         |
| DX/ZnSO <sub>4</sub> | NH <sub>4</sub> V <sub>4</sub> O <sub>10</sub>                      | 20 μm Zn  | 2 A g <sup>-1</sup>   | 2                                       | 8         | 9         |
| PEGDA additive       | ZnVO                                                                | 10 μm Zn  | 5 A g <sup>-1</sup>   | ~0.52                                   | 6.4       | 10        |
| FCOF coating         | MnO <sub>2</sub>                                                    | ~20 μm Zn | 4 mA cm <sup>-2</sup> | ~1.44                                   | 5         | 11        |
| TMU20                | NH <sub>4</sub> V <sub>4</sub> O <sub>10</sub>                      | 10 μm Zn  | 0.5 A g <sup>-1</sup> | ~1.2                                    | 4.01      | 12        |
| RME                  | Zn <sub>0.25</sub> V <sub>2</sub> O <sub>5</sub> •nH <sub>2</sub> O | 30 μm Zn  | 56 mA g <sup>-1</sup> | 5.5                                     | 3.2       | 13        |
| BE-ZrP               | LMO                                                                 | Zn powder | 1C                    | 1.1                                     | 3         | 14        |

## References

- 1 F. Wan, L. Zhang, X. Wang, S. Bi, Z. Niu, J. Chen, *Adv. Funct. Mater.*, 2018, **28**, 1804975.
- 2 K. Leng, G. Li, J. Guo, X. Zhang, A. Wang, X. Liu, J. Luo, *Adv. Funct. Mater.*, 2020, **30**, 2001317.
- 3 Z. Peng, A. G. Bannov, S. Li, Y. Huang, L. Tang, L. Tan, Y. Chen, *Adv. Funct. Mater.*, 2023, **33**, 2303205.
- 4 H. He, J. Lian, C. Chen, Q. Xiong, C. Li, M. Zhang, *Nano-Micro Lett.*, 2022, **14**, 106.
- 5 Q. Fu, S. Hao, X. Zhang, H. Zhao, F. Xu, J. Yang, *Energy Environ. Sci.*, 2023, **16**, 1291-1311.
- 6 L. Wang, M. Peng, J. Chen, T. Hu, K. Yuan, Y. Chen, *Adv. Mater.*, 2022, **34**, 2203744.

- 7 J. Shin, J. Lee, Y. Kim, Y. Park, M. Kim and J. W. Choi, *Adv. Energy Mater.*, 2021, **11**, 2100676.
- 8 J. Hao, X. Li, S. Zhang, F. Yang, X. Zeng, S. Zhang, G. Bo, C. Wang and Z. Guo, *Adv. Funct. Mater.*, 2020, **30**, 2001263.
- 9 T. Wei, Y. Ren, Y. Wang, L. Mo, Z. Li, H. Zhang, L. Hu and G. Cao, *ACS Nano.*, 2023, **17**, 3765-3775.
- 10 J. Zhao, C. Song, S. Ma, Q. Gao, Z. Li, Y. Dai and G. Li, *Energy Storage Mater.*, 2023, **61**, 102880.
- 11 Z. Zhao, R. Wang, C. Peng, W. Chen, T. Wu, B. Hu, W. Weng, Y. Yao, J. Zeng, Z. Chen, P. Liu, Y. Liu, G. Li, J. Guo, H. Lu and Z. Guo, *Nat. Commun.*, 2021, **12**, 6606.
- 12 Z. Li, Y. Liao, Y. Wang, J. Cong, H. Ji, Z. Huang and Y. Huang, *Energy Storage Mater.*, 2023, **56**, 174-182.
- 13 Y. Wang, T. Wang, S. Bu, J. Zhu, Y. Wang, R. Zhang, H. Hong, W. Zhang, J. Fan and C. Zhi, *Nat. Commun.*, 2023, **14**, 1828.
- 14 H. Peng, C. Wang, D. Wang, X. Song, C. Zhang and J. Yang, *Angew. Chem. Int. Ed.*, 2023, **62**, e202308068.
